# Supplementary material for: Soil organic carbon stocks in semi-arid West African drylands: implications for climate change adaptation and mitigation
Source: Copernicus journal article supplement (doi:10.5194/soil-2016-45), 2016-07-04
Supplement: Supplementary file [file soil-2016-45-RC1-supplement.zip]

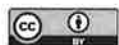

**1 Soil organic carbon stocks in semi-arid West African drylands: implications**  
**2 for climate change adaptation and mitigation**

3

4 Jérôme Ebagnerin Tondoh<sup>1\*</sup>, Issa Ouédraogo<sup>2</sup>, Jules Bayala<sup>3</sup>, Lulseged Tamene<sup>4</sup>, Andrew  
5 Sila<sup>5</sup>, Tor-Gunnar Vågen<sup>5</sup>, Antoine Kalinganiré<sup>3</sup>

6

7 <sup>1</sup>WASCAL Competence Center, 06 P.O. Box 9507 Ouagadougou 06, Burkina Faso

8

9 <sup>2</sup>INERA Kamboinssé, 12 BP 33 Ouagadougou 12, Burkina Faso

10

11 <sup>3</sup>ICRAF West and Central Africa. Sahel Node BPE 5118 Bamako, Mali

12

13 <sup>4</sup>CIAT, Chitedze Research Station, Michinji Road, Lilongwe Box 158, Malawi

14

15 <sup>5</sup>ICRAF (World Agroforestry Centre), United Nation Avenue, Gigiri PO Box 30677, 00100,  
16 Nairobi, Kenya

17

18

19

20

21

22

23

24

25

26

27 \*Corresponding author

28 Telephone: +226 67433619/63006876

29 Email: [tondoh.e@wasca.org](mailto:tondoh.e@wasca.org)

30

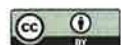

# Abstract

In the West African drylands, ~~SOC~~ <sup>Soil organic carbon</sup> sequestration is seen as one of the ~~prominent~~ <sup>main</sup> strategies to both enhance the resilience of agro-ecosystems and mitigate global greenhouse effects. However, there is a dearth of baseline data that impeded <sup>their</sup> the design of site-appropriate recommended management practices (RMPs) to improve and sustain SOC accrual. In this study, the Land Degradation Surveillance Framework (LDSF), a nested hierarchical sampling design, was used to assess SOC stock and ~~its~~ <sup>their</sup> spatial variability across the semi-arid zones of Ghana (Lambussie), Burkina Faso (Bondigui) and Mali (Finkolo). Soil samples were collected from three sites ~~of~~ <sup>in size</sup> 100 km<sup>2</sup> stratified into 16 clusters <sup>with 10 plots per cluster for a total of 160</sup> and 160 plots and thereafter ~~soil~~ <sup>soil</sup> parameters were then analyzed using ~~MIR~~ <sup>mid-infrared</sup> spectroscopy. Regardless of soil strata, SOC storage ~~at each site~~ <sup>mean (±6 CI) at the sites</sup> with 95% confidence level in semi-arid landscapes potentially ranged between ~~from~~ 112,200±14,000 and 253,000±34,000 Mg C ~~corresponding to~~ <sup>one</sup> 411,400±51,333 Mg CO<sub>2</sub>-eq and 927,666.7±124,666.7 Mg CO<sub>2</sub>-eq in the entire study area. On the other hand, investigation on the potential of climate change mitigation through ~~SOC~~ <sup>Soil organic carbon</sup> revealed contrasted figures as accumulation rates in cultivated lands ranged from 0.04 to 0.18 Mg C ha<sup>-1</sup> yr<sup>-1</sup> and are ~~balanced~~ <sup>depending on soil layer and site</sup> by higher depletion rates of -0.004 to -0.73 Mg ha<sup>-1</sup> yr<sup>-1</sup>. This indicates the potential of semi-arid soils to ~~store carbon~~ <sup>restore C</sup> through improved land management practices. Landscape study ~~that was~~ <sup>This scale</sup> structured in cluster-level analysis revealed heterogeneity in the distribution of SOC stocks, ~~indicating~~ <sup>that</sup> mandatory finer level analysis <sup>may be required</sup> prior to effective decision-making about RMPs.

**Keywords:** Agro-ecosystems, land use, resilience, site appropriate management, soil organic carbon sequestration, West Africa.

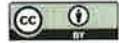

## 52 1. Introduction

53 In drylands, biomass production is constrained by the recurrence of drought and poor soil  
54 quality (Lal, 2004a). As a result, the capacity of dryland soils to function and deliver key  
55 ecosystem services such as food production, climate and water regulation and nutrient cycling  
56 are severely undermined. This situation is ~~even~~ worsened by improper or unsustainable land  
57 use and poor management practices leading to further degradation. Once set in motion, soil  
58 degradation brings about an ever increasing downward spiral that leads to decline in soil and  
59 environment quality magnified by overgrazing, residue removal and extractive farming (Lal,  
60 2015). Indeed, traditional agricultural practices in West African drylands are ~~mostly~~ *dominated*  
61 ~~characterized~~ by extractive farming characterized by the removal of almost all crop residues  
62 from the soil surface, which results in decreased soil organic matter (SOM), impaired soil  
63 biological activities, weakening of soil structure, and ~~disrupted water dynamics~~ *ion of soil hydrology (e.g.,*  
64 *infiltration, retention and release for plant growth)* (Bationo et al., 2007; Karlen and Rice,  
65 2015). Generally, soil degradation leads to ~~the disruption of~~ *impaired* soil health, most importantly soil  
66 organic carbon (SOC), which is ~~the~~ *a* key indicator for soil health due to its multiple effects in  
67 enhancing soil functions (Liu et al. 2006, Lal, 2015; Stockmann et al., 2015). SOC influences  
68 all aspects of soil fertility as it (i) provides available nutrients to plants, (ii) improves soil  
69 structure and water holding capacity, (iii) provides food for soil organisms and (iv) ~~buffer~~ *s*  
70 toxic and harmful substances (Chan, 2010). Thus, depletion of ~~SOC pool~~ *the* in agricultural lands  
71 leads to ~~the~~ *a* reduction *in the* of soil carbon sink capacity and increases greenhouse gas (GHG)  
72 emission into the atmosphere (Powelson et al., 2011; Lal 2015; Milne et al., 2015). Therefore,  
73 enhancing SOC pools in agricultural lands through recommended management practices  
74 (RMPs) is now recognized as a global environmental challenge (Milne et al., 2015). It is also  
75 the most realistic and sustainable way to reduce soil degradation (Bationo et al., 2007, Rajan  
76 et al., 2010), improve soil health and long-term agricultural productivity (Syers, 1997; Lal,

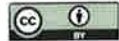

2006; Forage et al., 2007; Cowie et al., 2011) and mitigate carbon dioxide (CO<sub>2</sub>) concentration in the atmosphere through SOC sequestration (Lal, 2005; Powlson et al., 2011; Plaza-Bonilla, et al., 2015). More specifically, increasing <sup>the concentration of C</sup> SOC <sup>soils A</sup> pool in cultivated lands beyond the <sup>replace with endash</sup> recommended threshold of 15–20 g kg<sup>-1</sup> is essential to set in motion soil processes that lead to soil quality restoration and maintenance (Aune and Lal, 1997; Loveland and Webb, 2003; Lal, 2015). However, to date empirical data related to the response of SOC to land management at landscape and regional scales are rare. The objectives of the current study were to (i) provide baseline data of SOC stocks across sentinel sites in semi-arid landscapes of West Africa, where the Consultative Group on International Agricultural Research (CGIAR) Drylands program is being rolled out, (ii) discuss the potential of SOC storage to mitigate <sup>the</sup> global warming effect, and (iii) make recommendations for site-specific interventions to improve soil health and enhance agricultural production.

## 2. Materials and methods

### 2.1 Study area

This study was conducted along the action site Wa/Bobo-Dioulasso/Sikasso (WBS) of the CGIAR Drylands Program spanning Ghana, Burkina Faso and Mali with special reference to the Strategic Research Theme 3 (SRT3) (CRP Drylands Systems, 2012). The objective of SRT3 <sup>is</sup> was to sustainably intensify agricultural production systems in order to achieve food security and poverty reduction. The study area is a set of three sentinel sites each covering <sup>an area of 100 km<sup>2</sup></sup> <sup>(10 by 10 km)</sup> ~~(100 km<sup>2</sup>)~~ each located in the semi-arid zones of Lambussie (Upper-East region of Ghana), Bondigui (Southwestern Burkina Faso) and Finkolo (Southwestern Mali) <sup>respectively</sup> (Fig. 1). The three sites belong to the Sudanese savanna with an average total rainfall over 41 years (1970 <sup>replace with endash</sup> 2010) of 1014±181 mm, 841±132 mm, and 1109±181 mm in Lambussie, Bondigui and Finkolo, respectively (Fig. 2). <sup>sites</sup> They were derived from the network of the AfSIS program on soils across Sub-Saharan Africa (Vågen et al., 2010). Drought history

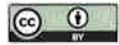

across the study sites was analyzed using the Standard Precipitation Index (SPI) as recommended by Bordi et al. (2001). It revealed similar dry years across the sentinel sites ranging from 18 to 19 <sup>years</sup> out of 41 years (Fig. 2). However, unlike Lambussie which is characterized by an aggregation of drought periods from 1970 to 1976 as well as 1981 to 1992 with the driest year being 1986, Bondigui and Finkolo showed a regular distribution of dry and wet years throughout the analyzed period. <sup>41 years</sup> Rainfall ranges in the study sites were found to <sup>The range involves for annual precipitated were</sup> be 517 <sup>replace with endash</sup> 1326 mm, 611 <sup>and</sup> 1211 mm, 755 <sup>the precipitation</sup> 1535 mm in Lambussie (Ghana), Bondigui (Burkina Faso) and Finkolo (Mali), respectively. Broadly, soils of the three sites are sandy loam or finer <sup>in texture,</sup> and highly weathered soils which are classified as <sup>S</sup>lxisols (FAO/EC/ISRIC, 2003; Towett et al., 2015). They are characterized by slight acidity with a clay-enriched subsoil and low nutrient <sup>at</sup> holding capacity.

Farming activities are the dominant human activities in the sites. Across the study areas, lands <sup>at</sup> are prepared <sup>for seeding by filling to a depth of 8-10 cm with oxen-driven plows.</sup> with fire along with oxen-driven plow at 8-10 cm depth. An overwhelming majority of farmers use organic fertilizers (manure and compost) as inputs to replenish soil fertility. <sup>apply</sup> Nevertheless, wealthier farmers use inorganic fertilizers (NPK <sup>in</sup> most <sup>in</sup> cases) in their fields <sup>a</sup> at the rate of 125 kg ha<sup>-1</sup>, generally two weeks after emergence of seedlings (Becx et al., 2012; Sissoko et al., 2013). In Burkina Faso and Mali, cotton cultivation has contributed to the increase of maize yields (main staple food) that takes advantage of the presence of inorganic fertilizers in the soil, thereby contributing to enhancing agricultural production in some areas (Laris et al., 2015).

## 2.2 Field survey and soil sampling

Field surveys and soil sampling were carried out from 2009 to 2011 using the Land Degradation Surveillance Framework (LDSF) (Vågen et al., 2013; Vågen et al., 2016). Practically, the LDSF is a spatially stratified hierarchical sampling design targeting land degradation assessment. It consists of qualitative and quantitative field observations on land



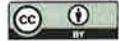

127 use, land geomorphology, soil description and sample collection<sup>and</sup> vegetation description and  
128 characterization within a site of 100 km<sup>2</sup> organized around 16 clusters each composed of 10  
129 georeferenced sampling plots (Fig. 3). Both field survey and soil sample collection were  
130 undertaken at plot (1000 m<sup>2</sup>) and subplot (100 m<sup>2</sup>) levels. For each plot, a total of 160 topsoil  
131 (0-20 cm) and 160 subsoil (20-50 cm) samples were collected and kept in polythene ziplock  
132 bags for further laboratory processing and analyses.

133 In order to avoid high uncertainties in bulk density measurement using the sample corer, the  
134 cumulative mass approach was used in this study (Betemariam et al., 2011). For that, soil was  
135 collected with the help of an auger at the center point of each sampling plot at the same depths  
136 using a sampling plate to aid full recovery of the soil sample. Soil samples from each depth  
137 were labeled and taken to laboratory for processing and oven-dry moisture measurement.

### 138 2.3 Soil processing and analyses

#### 139 2.3.1 Laboratory analyses

140 Air-dried standard soil samples were passed through 2 mm mesh of sieve of which 32 top and  
141 subsoil samples per site were selected for traditional wet chemistry methods to determine  
142 SOC, pH (1:1 solution in water) base cations (Melich-3 extraction) at the Crop Nutrition  
143 Laboratory ([www.cropnuts.com](http://www.cropnuts.com)) in Nairobi, Kenya. Texture was measured using a laser

144 diffraction particle size analyzer after dispersion of soil samples as per the procedure detailed  
145 in Winowiecki et al. (2015). <sup>The</sup> ~~As~~ for cumulative mass soil samples, ~~they~~ were sieved to fine  
146 and coarse fragments. Small quantities of each sample were weighed and oven-dried to derive

147 the gravimetric water content that ~~is to be used to determine oven-dried soil weight at 0-20~~  
148 and 20-50 cm (Betemariam et al., 2011). The 32 samples were randomly selected from each

149 site ensuring <sup>from the mid infrared spectra from the remaining samples.</sup> that both topsoil and subsoil were from the same sampling point to predict SOC  
150 concentration. <sup>from the mid infrared spectra from the remaining samples.</sup> for the remaining soil samples ~~were~~ grounded to < 100 µm with an agate mortar and

151 pestle (Shepherd and Walsh, 2002; Vågen et al., 2006; Terhoeven-Urselmans et al., 2010).

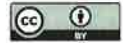

### 152 2.3.2 Spectral calibration and soil organic carbon prediction

153 Mid-infrared Spectroscopy (MIRS), a non-destructive, cost-effective and rapid methodology,  
 154 was used to analyze all soil samples. The acquired spectra <sup>acquired</sup> were ~~used to SOC prediction~~  
 155 ~~models SOC concentrations of the 32 samples obtained from a conventional analysis were~~ <sup>from</sup> ~~used for the~~  
 156 calibrated to the first derivative of the reflectance spectra using partial least squares regression  
 157 (PLSR) as recommended by Terhoeven-Urselmans et al. (2010). The regression models were  
 158 ~~thereafter~~ <sup>using their reflectance spectra.</sup> used to predict SOC for the rest of the samples ~~under investigation~~. The prediction  
 159 performance was evaluated using the coefficient of determination ( $R^2$ ) of the PLSR model  
 160 along with the root mean square errors of calibration (RMSEC).

### 161 2.3.3 Calculation of soil organic carbon stocks and total CO<sub>2</sub> equivalent

162 For a given soil layer, <sup>the</sup> SOC stock was calculated by multiplying the <sup>C</sup> ~~carbon~~ concentration in  
 163 soil fines with bulk density and soil depth (Betemariam et al., 2011):

$$164 \text{ SOCstock} = \frac{C}{100} \times Bd \times D \times (1 - frag) \times 100, \text{ where}$$

165 - SOCstock = soil organic <sup>C</sup> ~~carbon~~ stock (Mg C ha<sup>-1</sup>)

166 - C = soil organic <sup>C</sup> ~~carbon~~ concentration of soil fines (fraction < 2 mm) determined in the  
 167 laboratory (% g kg<sup>-1</sup>)

168 - Bd = soil bulk density (i)

169 - D = depth of the sampled soil layer (cm)

170 - <sup>frag</sup> ~~Frag~~ = % volume of coarse fragments/100

171 100 is used to convert the unit to Mg C ha<sup>-1</sup>

172 (i)  $Bd = \frac{M}{V}$ , where

173 M = oven-dry weight of soil (g)

174 V = volume of soil (cm<sup>3</sup>).

175 SOC total stock of a given sentinel site covering 100 km<sup>2</sup> was estimated by multiplying the

176 value by 10 000. The obtained value was converted into carbon dioxide equivalents (CO<sub>2</sub>-eq.)

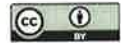

177 by applying the conversion factor of (44/12) (Danielsen et al., 2009).

178 ~~On the other hand, SOC storage~~ <sup>accumulation</sup> rate was calculated by dividing SOC stocks by <sup>the</sup> number of  
 179 years that a land has been cultivated <sup>or in a</sup> and semi-natural <sup>state</sup> stands (Kongsager et al., 2013), which  
 180 according to farmers, were estimated at 20, 20 and 21 years at Lambussie, Bondigui and  
 181 Finkolo sites, respectively. In order to assess the potential rate of SOC storage in agricultural  
 182 lands across sites, semi-natural lands were used as benchmark and compared to cultivated ones  
 183 (Corsi et al. 2012).

#### 184 2.4 Data analysis

185 The comparison of SOC across sentinel sites was performed using the non-parametric  
 186 Kruskal-Wallis test along with the pairwise multiple comparison of mean ranks test of  
 187 Nemenyi. The difference in SOC stocks between semi-natural and cultivated lands throughout  
 188 the landscape was statistically <sup>using</sup> assessed with the help of the non-parametric Mann-Whitney  
 189 test. The relationship between SOC stocks and soil texture parameters <sup>was evaluated</sup> were tested by  
 190 ~~computing a correlation matrix~~ using Spearman <sup>is</sup> correlation coefficient. All statistical analyses  
 191 were done using R software version 3.2.2 (R Development Core Team, 2015) at a significance  
 192 level of 0.05.

### 193 3. Results

#### 194 3.1 Land use characterization

195 In general, the landscapes under investigation are flat with altitudes varying between 273 and  
 196 <sup>a.s.l.</sup> 432 m (Bondigui: 273.2±12.6 m; Lambussie: 301.5±3.8 m; Finkolo: 431.8±12.6 m). The main  
 197 land-use types <sup>is</sup> include parklands associated with food crops (Table 1). Keystones tree species  
 198 <sup>are</sup> namely *Vitellaria paradoxa*, *Parkia biglobosa*, *Bombax costatum* and sometimes, exotic fruit  
 199 trees such as *Mangifera indica*, *Citrus lemon* <sup>long</sup> were regularly found across sites. Within <sup>the</sup>  
 200 parklands, crops were <sup>managed using</sup> sown in the form of fallow/food crop rotations or recurrent cropping in  
 201 Lambussie, Ghana. Mango orchards / maize (*Zea mays*) association, cotton (*Gossypium*



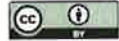

202 *hirsutum*)/maize rotation<sup>s</sup> and millet (*Pennisetum glaucum*) / cowpea (*Vigna unguiculata*) rotation<sup>s</sup>  
 203 were the most dominant<sup>practices</sup> in Bondigui, Burkina Faso. Finally, cotton/maize rotation<sup>s</sup>  
 204 maize/sweet potato (*Ipomoea batatas*) association<sup>s</sup> *M. indica*/food crops<sup>with</sup> cropping in  
 205 mango and *Citrus lemon* orchards were found in Finkolo, Mali. Furthermore, the prevalence<sup>amounts</sup> average percent  
 206 of the sites<sup>the sites</sup> areas under cultivation were on average  $44 \pm 0.02\%$  in Bondigui,  $71 \pm 0.02\%$  in  
 207 Lambussie and  $52 \pm 0.03\%$  in Finkolo (Table 2).

### 208 3.2 Soil baseline data of sentinel sites

209 Soils of all sites were slightly acidic (pH 5.3 to 6.7) for both soil layers (Table 3). The values  
 210 of pH, <sup>Total C, Total N and Ca</sup> and SOC were statistically lower at Finkolo <sup>for both soil layers</sup> in the topsoil as compared with the two  
 211 other sites. Total N content followed almost the same trend and displayed low concentrations  
 212 throughout the soil profiles with highest values in the topsoil. As for exchangeable cations,  
 213 <sup>Values for exchangeable</sup> apart from Ca values, <sup>for</sup> which in Bondigui and Lambussie <sup>were</sup> reached about 5 fold <sup>times higher than the</sup> the value of Ca <sup>for</sup>  
 214 <sup>Potassium and</sup> in Finkolo; K, Mg concentrations were very low and similar irrespective of sites and sampling  
 215 depths. Extractable P seemed to be linked to <sup>Total C</sup> SOC variations in the topsoil as it showed  
 216 moderate concentrations in Bondigui and Lambussie with very low value in Finkolo, <sup>but these were not statistically significant, possibly due to the high variation in values for Lambussie</sup>  
 217 <sup>of the sites</sup> Concerning Soil texture, Bondigui was different from others with high percentage of clay and  
 218 <sup>percentages of</sup> moderate proportions in silt and sand. Consequently, soils in Bondigui can be referred to as  
 219 a clay soil while Lambussie and Finkolo were identified as having clay loam soils.

### 220 3.3 Soil organic carbon (SOC) stocks

221 <sup>Mid infrared spectra was a good predictor of total C concentration ( $R^2 = 0.97$ ; RMSEC = 0.24)</sup> The correlation coefficient  $R^2$  between SOC and the mid-infrared spectra was strong (0.97)  
 222 along with 0.24 as RMSEC value indicating a good efficiency of MIRS to determine SOC.  
 223 Figure 4 shows significant variations in SOC stocks across sentinel sites within the topsoil (0  
 224 20 cm), where the highest value ( $22.4 \pm 1.5 \text{ Mg C ha}^{-1}$ ) was obtained in Bondigui and the lowest  
 225 in Finkolo ( $11.2 \pm \text{Mg C ha}^{-1}$ ). In the subsoil (20-50 cm), Lambussie <sup>and Bondigui had</sup> displayed the highest  
 226 value<sup>s</sup> ( $25.3 \pm 1.7 \text{ Mg C ha}^{-1}$ ), Bondigui <sup>and</sup> ( $20.5 \pm 1.4 \text{ Mg C ha}^{-1}$ ) and Finkolo <sup>had significantly lower values compared with the other two sites</sup> ( $12.4 \pm 0.6 \text{ Mg C ha}^{-1}$ )  
 respectively,

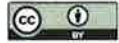

227 1).  
 228 Intra-site variations of SOC at Lambussie site were markedly significant both in topsoil and  
 229 subsoil (Fig. 8). In the 0-20 cm layer, the first zone with high values spanned clusters 2 to  
 230 cluster 8, which values ranged from  $12.4 \pm 2.6 \text{ Mg C ha}^{-1}$  to  $53.7 \pm 15.6 \text{ Mg C ha}^{-1}$ . The second  
 231 area stretching from cluster 12 to 16 had values ranging between  $10.4 \pm 1.3 \text{ Mg C ha}^{-1}$  and  
 232  $23.0 \pm 5.6 \text{ Mg C ha}^{-1}$ . In general, SOC stock values in the 20-50 cm layer were relatively high  
 233 except the values in cluster 2 ( $9.7 \pm 3.0 \text{ Mg C ha}^{-1}$ ), cluster 5 ( $6.3 \pm 1.8 \text{ Mg C ha}^{-1}$ ) and cluster  
 234 8 ( $3.5 \pm 2.5 \text{ Mg C ha}^{-1}$ ), which were significantly low (Fig. 5).  
 235 Apart from cluster 4 ( $9.6 \pm 1.0 \text{ Mg C ha}^{-1}$ ) and cluster 10 ( $11.8 \pm 2.7 \text{ Mg C ha}^{-1}$ ), SOC stock  
 236 values were high and varied markedly between  $12.5 \pm 1.9 \text{ Mg C ha}^{-1}$  and  $37.4 \pm 7.8 \text{ Mg C ha}^{-1}$   
 237 at Bondigui site. Values were even higher in subsoil (20-50 cm), where clusters 6 ( $10.7 \pm 3.6$   
 238  $\text{Mg C ha}^{-1}$ ) and 8 ( $10.6 \pm 3.6 \text{ Mg C ha}^{-1}$ ) were among the lowest (Fig. 5).  
 239 Finkolo site had the lowest SOC stocks in both layers throughout all clusters. Only the topsoil  
 240 showed significant variations across clusters as values ranged from  $5.7 \pm 0.7 \text{ Mg C ha}^{-1}$  (Cluster  
 241 2) to  $17.2 \pm 3.3 \text{ Mg C ha}^{-1}$  (Cluster 5). Though not significant, variations in the subsoil revealed  
 242 the existence of discrepancies among clusters as evidenced by the wide range from  $8.4 \pm 0.8$   
 243  $\text{Mg C ha}^{-1}$  to  $21.0 \pm 3.1 \text{ Mg C ha}^{-1}$ .  
 244 The potential values of SOC stored in soils of study sites with 95% confidence level based on  
 245 total area covered ( $100 \text{ km}^2$ ) in each sentinel site were estimated in the topsoil at  
 246  $191,500 \pm 37,000 \text{ Mg C}$ ;  $224,000 \pm 30,000 \text{ Mg C}$  and  $112,200 \pm 14,000 \text{ Mg C}$  in Lambussie,  
 247 Bondigui and Finkolo, respectively (Table 4). In the same way, total SOC stock at  $\pm 95\%$   
 248 confidence level in the subsoil varied from  $124,000 \pm 28,000 \text{ Mg C}$  at Finkolo to  
 249  $253,000 \pm 34,000 \text{ Mg C}$  at Bondigui.

250 **3.4 Variation in SOC across land use types**  
 251 Cultivation resulted in significant drop in topsoil SOC stock in the Lambussie site as indicated

Values for total soil C concentration and SOC stocks  
 for Lambussie and Bondigui were almost double those for  
 Finkolo, regardless of soil layer.

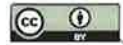

252 by the reduction in SOC stock from  $29.7 \pm 5.9 \text{ Mg C ha}^{-1}$  (Semi-natural areas) to  $15.7 \pm 1.4 \text{ Mg}$   
 253  $\text{C ha}^{-1}$  (Cultivated lands). However, no significant impacts were observed in Bondigui and  
 254 Finkolo though values showed huge intra-site variations (Table 5). In the subsoil, there were  
 255 ~~no meaningful changes brought about by cultivation as values of SOC stocks were similar in~~  
 256 ~~semi-natural and cultivated lands in Lambussie ( $19.5 \pm 3.4 \text{ Mg C ha}^{-1}$  versus  $20.7 \pm 1.6 \text{ Mg C}$~~   
 257  ~~$\text{ha}^{-1}$ ), Bondigui ( $23.4 \pm 2.1 \text{ Mg C ha}^{-1}$  vs  $26.9 \pm 2.5 \text{ Mg C ha}^{-1}$ ) and Finkolo ( $12.4 \pm 1.1 \text{ Mg C ha}^{-1}$~~   
 258  ~~$\text{vs } 12.3 \pm 0.8 \text{ Mg C ha}^{-1}$ ).~~

see comments

This just repeats what is in Table 5

259 On the other hand, figure 6 showed a very reasonable rise (+4.2%) of SOC stocks in cultivated  
 260 areas in Bondigui resulting in an accumulation rate of  $0.04 \text{ Mg C ha}^{-1} \text{ yr}^{-1}$ , while Lambussie  
 261 and Finkolo showed a drop on cultivated lands as compared to semi-natural ones. Hence, land  
 262 use change brought about a moderate (-21.4%) and significant (-47.4%) loss in SOC stocks in  
 263 Finkolo and Lambussie, respectively. As a result, depletion rates were estimated at  $-0.13 \text{ Mg}$   
 264  $\text{C ha}^{-1}$  and  $-0.71 \text{ Mg C ha}^{-1}$  Finkolo and Lambussie respectively. However, in the subsoil,  
 265 SOC storage rates were not significantly different between semi-natural and cropped areas,  
 266 SOC positively accumulated in Bondigui ( $+0.18 \text{ Mg ha}^{-1} \text{ yr}^{-1}$ ) and Lambussie ( $+0.07 \text{ Mg C}$   
 267  $\text{ha}^{-1} \text{ yr}^{-1}$ ) while almost no storage ( $-0.004 \text{ Mg C ha}^{-1} \text{ yr}^{-1}$ ) was found in Finkolo.

## 268 4. Discussion

### 269 4.1 Site characterization

270 Among the sentinel sites, Lambussie in Ghana was most cultivated with little variation across  
 271 clusters, indicating a fairly homogeneous distribution. The moderate percentage of cropping  
 272 areas in Finkolo is due to the fact that parts of the site fell within the protected area known as  
 273 "Forêt Classée de Finkolo-Sikasso". That likely explains the high inter-cluster variations of  
 274 cultivated area, as some of the clusters were not cultivated while those falling on farmers'  
 275 fields were almost entirely cultivated. Bondigui was the least cropped site although it has no  
 276 protected area. Plausible explanation lies in the fact that the site is located among the less

had the largest cultivated area, lowest variation in SOC stocks and greatest loss in SOC stocks in cultivated land compared with semi-natural land

variation in SOC stocks for the site

least cultivated

for this is

in an area with



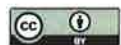

low population density (0-20 inhabitants per km<sup>2</sup>)  
 277 ~~populated areas in Burkina Faso, where population density is in the range of between 0 and~~  
 278 ~~20 inhabitants per km<sup>2</sup> (Ouédraogo, 2010). In this area fallow systems are still in use with the~~ and  
 279 ~~consequence of sparing~~ and woodlands (Devineau & Fournier, 2007), which would have been used  
 280 ~~for cultivation in other areas~~ are spaced more. Across sites, the most common land use systems are parklands  
 281 ~~known as the dominant~~ traditional agroforestry practice<sup>s</sup> that help farmers to cope with the  
 282 negative impacts of climate change and therefore strengthen their adaptive capacities (Bayala  
 283 et al., 2014). In both strata, soils were acidic in Finkolo and moderately acidic in Bondigui and  
 284 Lambussie. This surely had an impact on <sup>soil layers</sup> SOC concentrations that, when compared with the  
 285 critical limit of 20 g kg<sup>-1</sup> for an improved soil quality (Musunki et al., 2013; Lal, 2015), was  
 286 high in Bondigui (25.4±4.2 g kg<sup>-1</sup>), close in Lambussie (17.8±3.3 g kg<sup>-1</sup>), and low in Finkolo  
 287 (10.7±1.7 g kg<sup>-1</sup>). One can say soils in Bondigui and Lambussie had better quality compared  
 288 to Finkolo, where their acidic nature seemed to have negatively affected their quality. The  
 289 better soil quality and fertility in Bondigui might be due to short cultivation phase with  
 290 possibility to fallow due to low population density and thereby reduced pressure on lands. In  
 291 such cases, cultivable lands are left uncultivated during a long period that allows the  
 292 restoration of their fertility. <sup>This conclusion is supported by</sup> Results obtained in a similar environment with high demographic  
 293 pressure in Bougouni area, Mali, where fallows used recurrently for agricultural purposes were <sup>reduced</sup>  
 294 no longer rich in soil organic matter and nutrients (Benjaminsen et al., 2010) consolidate that  
 295 assumption.  
 296 **4.2 SOC stocks change across semi-arid landscapes of West Africa**  
 297 <sup>Of the three sites</sup> At site level, only Bondigui <sup>had higher</sup> showed higher SOC stocks in the topsoil compared to subsoil.  
 298 This is most likely due to low pressure on lands from both farming and livestock activities  
 299 that allows the biomass to accumulate on topsoil, <sup>plant</sup> and therefore contributing to higher soil organic  
 300 matter in the first 20 cm. However in Lambussie, high agricultural pressure on lands <sup>the topsoil.</sup> as  
 301 indicated by the prevalence of cultivated areas has resulted in a reduced average SOC stock in

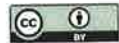

302 the arable <sup>topsoil</sup> layer of 20 cm. Across sites, SOC stocks in the topsoil varied between  $11.2 \pm 0.7$  and  
 303  $22.4 \text{ Mg C ha}^{-1}$  in line with values ranging from  $17.1$  <sup>to</sup>  $29 \text{ Mg C ha}^{-1}$  and  $17.4$  <sup>from</sup>  $34.4$   
 304  $\text{Mg C ha}^{-1}$  <sup>the</sup> found in Balé and Ziro provinces, <sup>respectively</sup> with similar environments in Burkina Faso,  
 305 <sup>however a different</sup> respectively (Dayamba et al., 2016) though ~~not similar~~ SOC measurement method was used.  
 306 <sup>Our subsoil</sup> Also, SOC stocks obtained in subsoil (20–50 cm) were lower compared to similar studies in  
 307 Burkina Faso, <sup>to</sup> precisely in the provinces of Balé ( $18.2$  <sup>from</sup>  $31.2 \text{ Mg C ha}^{-1}$ ) and Ziro ( $18.0$   
 308 <sup>to</sup>  $32.7 \text{ Mg C ha}^{-1}$ ) (Dayamba et al., 2016).  
 309 At cluster level the presence of SOC stock hotspots with various magnitudes in both soil layers  
 310 highlights the need to take into account landscape level variations (CV) when planning for  
 311 land management practices <sup>to</sup> for enhanced SOC accumulation. Moreover, when zooming in on  
 312 each cluster, high SOC stocks were strongly aggregated in Lambussie, indicating <sup>that</sup> land uses  
 313 <sup>have contrasting</sup> with contrasted impacts on soil organic matter. Combined with wide ranges of within-cluster  
 314 level variations in SOC stocks (values not shown) that varied from 39.6 to 111.8% in  
 315 Bondigui, 37.8 to 129.6% in Lambussie and 30.0 to 137.9% in Finkolo illustrating the  
 316 heterogeneity of clusters; this finding is instrumental in designing site-specific landscape  
 317 interventions for SOC accumulation improvement. Indeed, SOC stocks might be used as  
 318 indicators of soil quality and thereby help in prioritizing degraded areas for intervention.  
 319 Low values of SOC stocks in soil layers at site and cluster levels are likely caused by the  
 320 acidity of soils which is known to be a contributory factor to increased crop/plant residue  
 321 decomposition and fairly high erosion prevalence due to steep landscape (Rajan et al., 2010;  
 322 Obiri-Nyarko, 2012, Vågen and Winowiecki, 2013). Land cultivation has significantly  
 323 reduced 40% of SOC stocks in the topsoil of Lambussie and that might be due to the high  
 324 pressure <sup>the</sup> on lands with  $71 \pm 0.02\%$  of the area being cultivated. This result is in agreement with  
 325 findings of Gelwa et al. (2014) in a semi-arid watershed in Tigray, Northern Ethiopia revealing  
 326 that rainfed crop production was found to store less SOC ( $16.1 \pm 6.6 \text{ Mg C ha}^{-1}$ ) compared with

see  
 comments.

see  
 comment



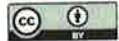

327 agroforestry-based crop production ( $25.8 \pm 1.8 \text{ Mg C ha}^{-1}$ ) and silvopasture ( $39.1 \pm 21.5 \text{ Mg C}$   
 328  $\text{ha}^{-1}$ ). The deficit ( $-19.3\%$ ) obtained in Finkolo's topsoil was not statistically significant. The  
 329 same observation applied to hints of surpluses noted in Lambussie subsoil ( $+6.7\%$ ), Bondigui  
 330 top ( $+13.1\%$ ) and sub ( $+1.9\%$ ) soil, and in Finkolo subsoil ( $+0.7\%$ ). Depletion of up to 50%  
 331 in SOC stock has been underlined in a similar study in Tanzania and was attributed to soil  
 332 erosion and unsustainable land management practices (Winowiecki et al., 2016). Likewise,  
 333 review studies through meta-analyses identified conversion of forest into croplands to be  
 334 accountable for 25 to 42% reduction in SOC stocks (Guo et al., 2002; Don et al., 2011), a  
 335 range comprising values found in Lambussie. Bondigui had similar high SOC stocks beneath  
 336 semi-natural ( $21.9 \pm 2.0$  versus  $23.4 \pm 2.1 \text{ Mg C ha}^{-1}$ ) and cultivated ( $22.8 \pm 2.2$  vs  $26.9 \pm 2.5 \text{ Mg}$   
 337  $\text{C ha}^{-1}$ ) lands indicating that the landscape might be globally less degraded and soils should be  
 338 responsive to agricultural intensification. As a general rule, rate of SOC accrual is higher in  
 339 20–50 cm vis-à-vis the topsoil indicating the plausible effect of decomposition and erosion  
 340 processes that are much more prominent in the superficial layers subjected to moderate tillage  
 341 and identified as factors influencing SOC accumulation rates (Corsi et al., 2012; Brown and  
 342 Huggins, 2012; Vågen and Winowiecki, 2013). Regardless of soil layer, SOC accumulation  
 343 rates in cultivated lands reported in the current study ( $0.04$  to  $0.18 \text{ Mg C ha}^{-1} \text{ yr}^{-1}$ ) are lower  
 344 than those reported in the literature under conservation agriculture ( $1.24$  to  $1.8 \text{ Mg}$   
 345  $\text{C ha}^{-1} \text{ yr}^{-1}$ ), improved grazing ( $0.22$  –  $0.7 \text{ Mg C ha}^{-1} \text{ yr}^{-1}$ ), animal manuring ( $1.5 \pm 0.1 \text{ Mg C ha}^{-1}$   
 346  $\text{yr}^{-1}$ ) in Brazil, the USA and Europe (Watson et al., 2000; Smith et al., 2000a, 2000b; West  
 347 and Post, 2002; de Moraes Sá and Seguy, 2008). Moreover, values obtained are by far smaller  
 348 than the potential soil carbon sequestration rate of  $0.25$  –  $0.5 \text{ Mg C ha}^{-1} \text{ yr}^{-1}$  that can be achieved  
 349 by changing management options (Lal, 2003). Very few studies have estimated SOC accrual  
 350 rates in cultivated lands in West Africa Sudanese savannas. Nevertheless, accumulation rate  
 351 of SOC estimated at  $4.3 \text{ Mg C ha}^{-1} \text{ yr}^{-1}$  beneath conservation agriculture in drylands of Western

see comments

The subsoil  
 ↑  
 could a simple  
 t-test be  
 used to test  
 this?

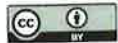

352 Nigeria (Ringius, 2002) is indicative of the fact that weathered soils in semi-arid lands can be  
 353 responsive to improved land management practices that aim at enhancing agricultural  
 354 production. On the other hand, the depletion rate of SOC stocks ( $-0.004$  to  $-0.71 \text{ Mg C ha}^{-1} \text{ yr}^{-1}$ )  
 355 <sup>1)</sup> seemed important and expressed the huge potential of agricultural soils in semi-arid areas  
 356 to have a high sink potential for carbon storage (Corsi et al., 2012). In any case, these figures  
 357 should be taken with caution as they might not be permanent and any changes in land  
 358 management or land use might cause a rapid variation undermining or stimulating SOC  
 359 accumulation (Smith et al., 1996). Baseline data provided across sites should guide further  
 360 land management decisions <sup>favor restoration of</sup> to replenish SOC in view of increasing agricultural production.

#### 361 **4.4 Implications of SOC storage for site-specific recommendations for enhanced** 362 **agricultural production**

363 Depletion in SOC is one of the most insidious and unseen processes of soil degradation that  
 364 negatively affect agricultural production in most cultivated lands of Sub-Saharan Africa (Lal,  
 365 2015; Montanarella et al., 2016). SOC is also used as indicator of soil quality and agricultural  
 366 sustainability because SOC-enriched soils have the capacity to improve and maintain soil  
 367 fertility and thereby sustain agricultural production (Loveland and Webb, 2003). One of the  
 368 most straightforward pathways to mitigating soil degradation in semi-arid drylands is to  
 369 maintain or replenish SOC concentrations above the critical level of  $20 \text{ g kg}^{-1}$  (Loveland and  
 370 Webb, 2003; Musunki et al., 2013; Lal, 2015). While the average SOC concentration in  
 371 Finkolo ( $10.7 \pm 1.7 \text{ g kg}^{-1}$ ) was below that threshold, Lambussie ( $17.8 \pm 3.3 \text{ g kg}^{-1}$ ) was close  
 372 and Bondigui ( $25.4 \pm 4.2 \text{ g kg}^{-1}$ ) above, indicating the need for land management <sup>site specific</sup> prospects that <sup>approaches</sup>  
 373 ~~rely on sites' specificities~~. Likewise, most clusters in Finkolo (81.3%: 13 out of 16) have SOC  
 374 stocks below  $15 \text{ Mg C ha}^{-1}$  while the corresponding figure in Bondigui and Lambussie is only  
 375 25%. According to figure 7, deficits in SOC stocks are more pronounced in cultivated lands  
 376 in Lambussie and Finkolo, while only semi-natural lands are concerned in Finkolo. As <sup>see comments</sup>

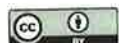

377 expected, surplus in SOC stocks was found in uncultivated lands in Lambussie while all land  
 378 use types experienced that in Bondigui. Thus, Finkolo seems to be the priority site to target in  
 379 terms of interventions that should consist ~~of first~~ <sup>of</sup> raising the pH level prior to selecting the  
 380 most relevant land management options. In that regard, recommended practices such as  
 381 liming, application of manure and crop residues, judicious use of acid forming fertilizers  
 382 including urea, single and trisuperphosphate (SSP and TSP), the use of acid tolerant crops  
 383 (Cassava, rice, etc.) as well as agroforestry practices should be of interest (Obiri-Nyarko,  
 384 2012). ~~As for~~ <sup>are recommended</sup> agroforestry, practices involving leguminous trees and shrubs such as *Albizia*  
 385 *zygia*, *Gliciridia sepium* (Baggie et al., 2000), and *Cajanus cajan* (Riddley et al., 1990) ~~might~~  
 386 <sup>because ? (explain why)</sup> ~~be recommended~~. In Lambussie, clusters with low SOC stocks should be primarily targeted  
 387 with conservation agriculture, integrated nutrient management, improved grazing and cover  
 388 crop farming that are ~~most indicated~~ <sup>advised practices</sup> for SOC accrual in weathered soils (Lal, 2004; 2005;  
 389 2006; Bayala et al., 2012).

390 **4.5 Implications for climate change mitigation**

391 Regardless of soil ~~strata~~ <sup>layer</sup>, SOC storage in ~~semi-arid~~ <sup>our</sup> landscapes ~~potentially~~ ranged between  
 392  $112,200 \pm 14,000$  and  $253,000 \pm 34,000$  Mg C corresponding to  $411,400 \pm 51,333$  Mg CO<sub>2</sub>-eq  
 393 and  $927,666.7 \pm 124,666.7$  Mg CO<sub>2</sub>-eq in the target countries. On the other hand, the potential  
 394 of climate change mitigation through SOC revealed contrasted figures as accumulation rates  
 395 in cultivated lands ranged from 0.04 to 0.18 Mg C ha<sup>-1</sup> yr<sup>-1</sup> and were balanced by higher  
 396 depletion rates of -0.004 to -0.73 Mg ha<sup>-1</sup> yr<sup>-1</sup> which indicates the potential of semi-arid soils  
 397 to store carbon. These figures are useful insights for devising improved land management  
 398 practices that will overcome constraints and enhance SOC storage. In the context of the current  
 399 study, promising RMPs that have been experimented ~~in~~ <sup>on</sup> the study area should be  
 400 recommended. They should include agricultural intensification, improved rangelands,  
 401 agroforestry-led conservation agriculture, and rehabilitation of degraded lands (Reij et al.,

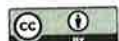

2009; Bayala et al., 2012). Indeed, Raji and Ogunwale (2006) reported a rise of 115% in SOC  
in trials supplemented with manure and NPK over 45 years in semi-arid savannas of Nigeria,  
while 18 years of application of NPK has resulted in an accrual of 0.28 - 0.41 Mg C ha<sup>-1</sup> yr<sup>-1</sup>.  
Moreover, the same authors revealed that improved pastures based on enrichment of  
*Brachiaria decumbens* contributed to the storage of 0.57 Mg C ha<sup>-1</sup> yr<sup>-1</sup> in the soil. At a larger  
scale, the rehabilitation approach of degraded parklands referred to as farmer-managed natural  
regeneration (FMNR), a cost-effective agroforestry practice that helped in restoring and  
sustaining the productivity of 5,000,000 ha of lands in the southern region of Maradi, Niger  
(Reij et al., 2009) should be upscaled to the entire area of the study. From Niger, where it has  
been primarily successfully tested, this climate-smart practice, is now being promoted in  
Ghana <sup>in an area of</sup> over 500 ha with 396,000 trees in Talensi-Nabdam District, Upper-East region (Weston  
et al., 2013). In Burkina Faso, part of the country is now made up of rejuvenated agroforestry  
parklands, while in Mali, about 6,000,000 ha of degraded parklands are <sup>being</sup> ~~under~~ regeneration  
through FMNR (Reij, 2012). Soil fertility enhancement as one of the environmental impacts  
of FMNR, is strongly linked to SOC build up. In addition to increasing aboveground biomass,  
FMNR also has the potential of sequestering up to 5.4 Mg CO<sub>2</sub>-eq yr<sup>-1</sup> as shown recently in  
Ethiopia (Rob, 2015) with an undeniable impact on SOC stock.<sup>5</sup>

## 5. Conclusion

This study is the first attempt to demonstrate the <sup>C</sup> ~~carbon~~ sink potential of soils at large scale in  
semi-arid areas in West Africa using empirical data. Except <sup>for</sup> ~~some~~ constraints due to  
acidification in Finkolo area in Mali, soils were found to be globally suitable for agricultural  
intensification as their SOC concentrations ranged between 10.7±1.7 g kg<sup>-1</sup> and 25.4±4.2 g kg<sup>-1</sup>  
with relatively high proportion of clay (35.4±0.4 to 448.8±3.8%). Moreover, low values of  
SOC accumulation rates magnified by higher depletion rates are indicative of the potential of  
drylands soils to help in adapting and alleviating climate change effects in semi-arid West

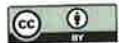

427 Africa. Site and cluster-level analysis revealed the heterogeneity in SOC stocks distribution at  
428 landscape scale, a mandatory finer level analysis prior to decision-making about  
429 Recommended Management Practices. Further studies should focus on (i) setting out critical  
430 values of SOC stocks beyond which agriculture can be smart and sustain production, and (ii)  
431 determining the SOC accumulation potential of the most effective RMPs. These actions seem  
432 achievable if ~~long-term~~ <sup>results from</sup> agronomic trials across West Africa are ~~gathered~~ <sup>compiled</sup> and analyzed with  
433 ~~relevant approaches~~. In the same way, assessment of the contribution of FMNR along with  
434 land and water conservation practices that have been widely adopted by farmers in West Africa  
435 (Reij et al., 2009) to the global <sup>C</sup> ~~carbon~~ budget must be a research priority.

436

#### 437 **Acknowledgements**

438 This work is part of the Africa Soil Information Service (AfSIS) project funded by the Bill  
439 and Belinda Gates Foundation, which is gratefully acknowledged. It has also benefited from  
440 the financial support of the CGIAR Drylands Program in West Africa to acquire climate data.  
441 Moreover, field surveys and soil samples processing would not have been possible without  
442 the great contribution of scientists of the "Laboratoire Sol Eau et Plante" of the "Institut  
443 d'Economie Rurale" (IER), Sotuba, Bamako.



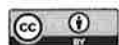

## 444 6. References

- 445 Baggie, I., Zapata, F., Sanginga, N., and Danso, S.K.A.: Ameliorating acid infertile rice soil  
446 with organic residues from nitrogen fixing trees. *Nutr. Cycl. Agroecosyst.*, 57, 183-190,  
447 2000.
- 448 Bationo, A., Kihara, J., Vanlauwe, B., Waswa, B., Kimetu, J.: Soil organic carbon dynamics,  
449 functions and management in West African agro-ecosystems. *Agr. Syst.*, 94, 13-25,  
450 2007.
- 451 Bayala, J., Sileshi, W.G., Coe, R., Kalinganire, A., Tchoundjeu, Z., Sinclair, F., Garrity, D.:  
452 Cereal yield response to conservation agriculture practices in drylands of West Africa:  
453 a quantitative synthesis. *J. Arid Environ.*, 78, 13-25, 2012.
- 454 Bayala, J., Sanou, J., Teklehaimanot, Z., Kalinganire, A., Ouédraogo, J.S.: Parklands for  
455 buffering climate risk and sustaining agricultural production in the Sahel of West Africa.  
456 *Curr. Opin. Environ. Sust.*, 6, 28-34, 2014.
- 457 Becc, G.A., Mol G., Eenhoorn, J.W., van der KAMP, J., van Vliet, J.: Perceptions on reducing  
458 constraints for smallholder entrepreneurship in Africa: the case of soil fertility in  
459 northern Ghana. *Curr. Opin. Environ. Sust.*, 4, 489-496, 2012.
- 460 Benjaminsen, A.T., Aune, B.J., Sidibé, D.: A critical political ecology of cotton and soil  
461 fertility in Mali. *Geoforum*, 41, 647-656, 2010.
- 462 Betemariam, A.E., Vågen, T.-G., Shepherd, K., Winowiecki, L.: A protocol for measurement  
463 and monitoring soil carbon stocks in agricultural landscapes. Version 1.1. World  
464 Agroforestry Centre, Nairobi, 2011.
- 465 Bordi, I., Frigio, S., Parenti, P., Speranza, A., Sutura, A.: The analysis of the Standardized  
466 Precipitation Index in the Mediterranean area: large-scale patterns. *Ann. Geof.*, 44, 965-  
467 978, 2001.
- 468 Brown, T.T., Huggins, D.R.: Soil carbon sequestration in the dryland cropping region of the

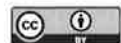

- 469 Pacific Northwest. *J. Soil Water Conservation*, 67, 406-415, 2012.
- 470 Dayamba, S.D., Djoudi, H., Zida, M., Sawadogo, L., Verchot, L.: Biodiversity and carbon  
 471 stocks in different land use types in the Sudanian Zone of Burkina Faso, West Africa.  
 472 *Agr. Ecosyst. Environ.*, 216, 61-72, 2016.
- 473 de Moraes Sà, J.C.M., Séguy, L., Gozé, E., Bouzinac, S., Husson, O., Boulakia, S., Tivet, F.,  
 474 Forest, F., dos Santos, B.J.: Carbon sequestration rates in no-tillage soils under intensive  
 475 cropping systems in tropical agroecozones. *Conservation Agriculture Carbon Offset*  
 476 *Consultation*, 2008 October 28-30, West Lafayette, Indiana, USA, 2008.
- 477 Chan, Y.K.: The important role of soil organic carbon in future mixed farming systems. In  
 478 Waters, C. and Garden, D. (eds). *Adapting mixed farms to future environments: 25<sup>th</sup>*  
 479 *Annual Conference of the Grassland Society of NSW Inc.* pp. 24-26, 2010.
- 480 Corsi, S., Friedrich, T., Kassam, A., Pisante, M., de Moraes, S.J.: Soil Organic Carbon  
 481 Accumulation and Greenhouse Gas Emission Reductions from Conservation  
 482 Agriculture: Integrated Crop Management Vol.16. Plant production and Protection  
 483 Division. FAO, 103 pp., 2012.
- 484 Cowie, A. L., Penman, T. D., Gorissen, L., Winslow, M. D., Lehmann, J., Tyrell, T. D.,  
 485 Twomlow, S., Wilkes, A., Lal, R., Jones, J. W., Paulsch, A., Kellner, K. and Akhtar-  
 486 Schuster, M.: Towards sustainable land management in the drylands: scientific  
 487 connections in monitoring and assessing dryland degradation, climate change and  
 488 biodiversity. *Land. Degrad. Dev.*, 22, 248-260, 2011.
- 489 CRP Dryland Systems: Integrated Agricultural Production Systems for Improved Food  
 490 Security and Livelihoods in Dry Areas. Inception phase report, 72 pp., 2012.
- 491 Danielsen, F., Beukema, H., Burgess, N.D., Parish, F., Bruhl, C.A., Donald, P.F., Murdiyarso,  
 492 D., Phalan, B., Reijnders, L., Struebig, M., Fitzherbert, B.: Biofuel plantations on  
 493 forested lands. *Double Jeopardy for Biodiversity and Climate Conserv. Biol.* 23, 348–

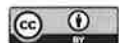

- 494 358, 2009.
- 495 Devineau, J-L, Fournier, A.: Integrating environmental and sociological approaches to assess  
 496 the ecology and diversity of herbaceous species in a Sudan-type savanna (Bondoukuy,  
 497 western Burkina Faso). *Flora*, 202, 350-370, 2007.
- 498 FAO/EC/ISRIC: World Soil Resources Map, 2003.
- 499 FAO: Climate-smart agriculture. Source book, pp 570, 2013.
- 500 Guo, B.L., Gifford, M.R.: Soil carbon stocks and land use change: a meta-analysis. *Glob.*  
 501 *Chang. Biol.*, 8, 345-360, 2002.
- 502 Kongsager, R., Napier, J., and Mertz, O.: The carbon sequestration potential of tree crop  
 503 plantations. *Mitig. Adapt. Strateg. Glob. Change*, 18, 1197-1213, 2013.
- 504 Lal, R.: Global potential of soil carbon sequestration to mitigate the greenhouse effect. *Crit.*  
 505 *Rev. Plant Sci.*, 22, 151-184, 2003.
- 506 Lal, R.: Carbon sequestration in dryland ecosystems. *Environ. Manage.*, 33, 528-544, 2004a.
- 507 Lal, R.: Soil carbon sequestration impacts on global climate change and food security. *Science*,  
 508 304, 1623-1627, 2004b.
- 509 Lal, R.: Enhancing crop yields in the developing countries through restoration of soil organic  
 510 carbon pool in agricultural lands. *Land Degrad. Dev.*, 17, 1997-209, 2006.
- 511 Lal, R.: Restoring soil quality to mitigate soil degradation. *Sustainability*, 7, 5895-5895, 2015.
- 512 Laris, P., Foltz, J.D., Voorhees, B.: Taking from cotton to grow maize: the shifting practices  
 513 of small-holder farmers in the cotton belt of Mali. *Agr. Syst.*, 133, 1-13, 2015.
- 514 Loveland, P., Webb, J.: Is there a critical level of organic matter in agricultural soils of  
 515 temperate regions? A review. *Soil Till. Res*, 70, 1-18, 2003.
- 516 Luedeling, E., Neufeldt, H.: Carbon sequestration potential of parkland agroforestry in the  
 517 Sahel. *Climatic Change*, 115, 443-461, 2012.

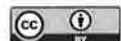

- 518 Liu, X., Herbert, J.S., Hashemi, M.A., Zhang, X., G. Ding, G.: Effects of agricultural  
519 management on soil organic matter and carbon transformation – a review. *Plant Soil*  
520 *Environ.*, 12, 531-543, 2006.
- 521 Milne, E., Banwart, A.S., Noellemeyer, E., Abson, J.D., Ballabio, C., Bamba, F., Bationo, A.,  
522 Batjes, H.N., Bernoux, M., Bhattacharyya, T., Black, H., Buschiazzi, E.D., Cai, Z.,  
523 Cerri, E.C., Cheng, K., Compagnone, C., Conant, R., Coutinho, L.C.H., de Brogniez, D.,  
524 de Carvalho Baliero, F., Duffy, C., Feller, C., Fidalgo, C.C.E., da Silva F.C., Funk, R.,  
525 Gaudig, G., Gicheru, T.P., Goldhaber, M., Gottschalk, P., Goulet, F., Goverse, T.,  
526 Grathwohl, P., Joosten, H., Kamoni, T.P., Kihara, J., Hrawczynski, R., La Scala Jr., N.,  
527 Lemanceau, P., Li, L., Li, Z., Lugato, E., Maro, P.-A., Martius, C., Melillo, J.,  
528 Montanarella, L., Nikolaidis, N., Nziguheba, G., Pan, G., Pascual, U., Paustian, K.,  
529 Piñeiro, G., Powelson, D., Quiroga, A., Riechter, D., Sigwalt, A., Six, J., Smith, J., Smith,  
530 P., Stocking, M., Tanneberger, F., Termansen, M., van Noordwijk, M., van Wesemael,  
531 B., Vargas, R., Victoria, L.R., Waswa, B., Werner, D., Wichmann, S., Wichtmann, W.,  
532 Zhang, X., Zhao, Y., Zheng, J., and Zheng, J.: Soil carbon, multiple benefits. *Environ.*  
533 *Dev.*, 13, 33-38, 2015.
- 534 Montanarella, L., Pennock, J.D., McKenzie, N., Badraoui, M., Chude, V., Baptista, I., Mamo,  
535 T., Yemefack, M., Aulakh, S.M., Yagi, K., Hong, Y.S., Vijarnsorn, P., Zhang, G.-L.,  
536 Arrouays, D., Black, H., Krasilnikov, P., Sobocká, J., Alegre, J., Henriquez, R.C., de  
537 Lourdes Mendonça-Santos, M., Taboada, M., Espinosa-V., AlShankiti, A., AlaviPanah,  
538 K.S., El Mustafá Elsheikh, A., Hempel, J., Arbestain, C.M., Nachtergaele, F., Varga, R.:  
539 World's soils are under threat. *Soil*, 2, 13-23, 2016.
- 540 Musinguzi, P., Tenywa, S.J., Ebanyat, P., Tenywa, M.M., Mubiru, N.D., Basamba, A.T., Leip,  
541 A.: Soil Organic Carbon Thresholds and Nitrogen Management in Tropical  
542 Agroecosystems: Concepts and Prospects. *J. Sustain. Dev.*, 6, 31-43, 2013.

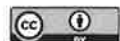

- 543 Obiri-Nyarko, F.: Ameliorating soil acidity in Ghana: a concise review of approaches. *J. Sci.*  
544 *Technol.*, 2, 143-153, 2012.
- 545 Ouédraogo, I.: Land use dynamics and demographic change in Southern Burkina Faso.  
546 Doctorate Thesis, Swedish University of Agricultural Sciences, Alnarp, Sweden. 143p.,  
547 2010.
- 548 Plaza-Bonilla, D., Arrúe, L.J., Cantero-Martínez, C., Fankó, R., Iglesias, A., Álvaro-Fuentes,  
549 J.: Carbon management in dryland agricultural systems. A review. *Agron. Sustain. Dev.*  
550 DOI 10.1007/s1359-015-0326-x, 2015.
- 551 Powlson, S.D., Whitmore, P.A., Goulding, T.W.K.: Soil carbon sequestration to mitigate  
552 climate change: a critical re-examination to identify the true and the false. *Eur. J. Soil*  
553 *Sci.*, 62, 42-55, 2011.
- 554 Rajan, K., Natarajan, A., Kumar, A.S.K., Badrinath, S.M., Gowda, C.R.: Soil organic carbon  
555 – the most reliable indicator for monitoring land degradation by soil erosion. *Curr. Sci.*,  
556 99, 823-827, 2010.
- 557 Reij, C., Tapan, G., Smale, M.: Agroenvironmental transformation in the Sahel. Another kind  
558 of “Green Revolution”. 2020 Vision Initiative, 2009.
- 559 Reij, C., 2012, African Re-greening Initiatives Blog, available at [http:// www.africa-](http://www.africa-regreening.blogspot.com.au)  
560 [regreening.blogspot.com.au](http://www.africa-regreening.blogspot.com.au).
- 561 Ringius, L.: Soil carbon sequestration and the CDM: opportunities and challenges for Africa.  
562 *Clim. Change*, 54: 471-495, 2002.
- 563 Rob, F.: The social, environmental and economic benefits of Farmer Managed Natural  
564 Regeneration (FMNR). World Vision Australia, 43 pp, 2015.
- 565 Shepherd, D.K., Walsh, G.M.: Development of reflectance libraries for characterization of soil  
566 properties. *Soil Sci. Soc. Am. J.*, 66, 988-998, 2002.
- 567 Sissoko, F., Affholder, F., Autray, P., Wery, J., Rapidel, B.: Wet years and farmer’s practices



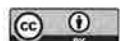

- 568 offset the benefits of residues retention on runoff and yield in cotton fields in the Sudan-  
 569 Sahelian zone. *Agric. Water Manage.*, 119, 89-99, 2013.
- 570 Smith, P., Powlson, D.S., Glendining, M.J., Establishing a European soil organic matter  
 571 network (SOMNET). In: Powlson, D.S., Smith, P., Smith, J.U. (Eds.), *Evaluation of Soil*  
 572 *Organic Matter Models using Existing Long-Term Datasets*. NATO ASI Series I, vol.  
 573 38. Springer-Verlag, Berlin, pp. 81-98, 1996.
- 574 Smith, W.N., Desjardins, R.L., Patty, E.: The net flux of carbon from agricultural soils in  
 575 Canada 1970 - 2010. *Glob. Chang. Biol.*, 6, 557-568, 2000a.
- 576 Smith, P., Powlson, D.S., Smith, J.U., Falloon, P., Coleman, K.: Meeting Europe's climate  
 577 change commitments: quantitative estimates of the potential for carbon mitigation by  
 578 agriculture. *Glob. Chang. Biol.*, 6, 525-539, 2000b.
- 579 Stockmann, U., Padarian, J., McBratney, A., Minasny, B., de Brogniez, D., Montanarella, L.,  
 580 Hong, Y.S., Rawlins, G.B., and Field, J.D.: Global soil organic carbon assessment.  
 581 *Global Food Sec.*, 6, 9-16, 2015.
- 582 Syers, K.J.: Managing soils for long-term productivity. *Phil. Trans. R. Soc. Lond. B*, 352,  
 583 1011-1021, 1997.
- 584 Terhoeven-Urselmans, T., Vågen, T.-G., Spaargaren, O., Shepherd, K.D.: Prediction of soil  
 585 fertility properties from a globally distributed soil mid-infrared spectral library. *Soil Sci.*  
 586 *Soc. Am. J.*, 74: 1792-1799, 2010.
- 587 Towett, K.E., Sheperherd, D.K., Tondoh, E.J., Winowiecki, A.L., Tamene, L., Nyamburara,  
 588 M., Sila, A., Vågen, T.-G., Cadish, G.: Total element composition of soils in Sub-  
 589 Saharan Africa and relationship with soil forming factors. *Geoderma Region.*, 5, 157-  
 590 168, 2015.
- 591 Vågen, T.-G., Shepherd D.K., Walsh, G.W., et al., 2010. AfSIS Technical Specification. Soil  
 592 Health Surveillance. CIAT (the AfSIS project), Nairobi. Kenya.

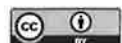

- 593 Vågen, T.-G., Winowiecki, A.L., Mapping of soil organic carbon stocks for spatially explicit  
594 assessments of climate change mitigation potential. *Environ. Res. Lett.*, 8, 1-9, 2013.
- 595 Vågen, T.-G., Winowiecki, A.L., Tamene, D.L., Tondoh, E.J.: The Land Degradation  
596 Surveillance Framework (LDSF) – Field guide v3. World Agroforestry Centre, Nairobi,  
597 2013.
- 598 Vågen, T.-G., Winowiecki, A.L., Tondoh, E.J., Desta, T.L., Thomas Gumbrecht, T.: Mapping  
599 of soil properties and land degradation risk in Africa using MODIS reflectance.  
600 *Geoderma*, 263, 216-225, 2016.
- 601 Watson, R.T., Noble, I.R., Bolin, B., Ravindranath, N.H., Verardo, D.J., Dokken, D.J. (Eds.),  
602 Land Use, Land Use Change, and Forestry. Cambridge Univ. Press, Cambridge, 2000.
- 603 West, O.T., Post, M.W.: Soil Organic Carbon Sequestration Rates by Tillage and Crop  
604 Rotation: A Global Data Analysis. *Soil Sc. Soc. Am. J.*, 66: 1930-1946, 2002.
- 605 Weston, P., Hong, R. and Morrison, V.: Talensi FMNR Project: End-of- Phase Evaluation  
606 Report, unpublished, World Vision Australia/World Vision Ghana, 2013.
- 607 Winowiecki, L., Vågen, T.-G., Massawe, B., Jelinski, A.N., Lyamchai, C., Sayula, G., Msoka,  
608 E.: Landscape-scale variability of soil health indicators: effects of cultivation on soil  
609 organic carbon in the Usambara Mountains of Tanzania. *Nutr. Cycl. Agroecosyst.*, DOI  
610 10.1007/s10705-015-9750-1, 2015.

611

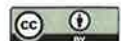

## Figure captions

613

614 Figure 1. Location of Lambussie (Ghana), Bondigui (Burkina Faso) and Finkolo (Mali)  
 615 sentinel sites in West Africa.

616

617 Figure 2. Standardized Precipitation Index (SPI) of Lambussie (Ghana), Bondigui (Burkina  
 618 Faso) and Finkolo (Mali) sentinel sites in West Africa over 41 years (1970-2010) showing  
 619 alternating of dry and wet years. *Negative values indicate years of drought. Long-term (41 year)*  
*mean annual precipitation for each site is shown in parentheses.*

620

621 Figure 3. *The* ~~Example~~ of a Lambussie sentinel site showing boundaries along *and location of*  
 622 sampling points *using* ~~allocation, as used in~~ the Land Degradation Surveillance Framework (LDSF)  
 623 sampling design.

624

625 Figure 4. *Topsoil and subsoil* ~~Vertical distribution~~ of average SOC stocks *(Mg ha<sup>-1</sup>)* for Lambussie (Ghana), Bondigui  
 626 (Burkina Faso) and Finkolo (Mali) sentinel sites in West Africa. *Similar bars with the same letters within a*  
 627 *soil layer are not significantly different.* ~~letters Bars with different letters within a~~  
~~letters are significantly different (Kruskal-Wallis test, p=0.05)~~

628

629 Figure 5. Cluster-level variation of SOC stocks *for topsoil and subsoil layers of the* ~~across the soil profile~~ for Lambussie (Ghana),  
 630 Bondigui (Burkina Faso) and Finkolo (Mali) sentinel sites in West Africa.

631

632 Figure 6. Accumulation rate of SOC stocks (Mg C ha<sup>-1</sup> yr<sup>-1</sup>) in cultivated lands across  
 633 Lambussie (Ghana), Bondigui (Burkina Faso) and Finkolo (Mali) sentinel sites in West Africa.

634 ~~Similar bars with different letters are significantly different (Kruskal-Wallis test, p=0.05).~~  
*Bars with the same letters within a soil layer are not significantly different.*

635

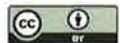

636 Figure 7. Normalized values of SOC stocks at different depths within ~~uncultivated~~ <sup>semi-natural</sup> and

637 cultivated areas across Lambussie (Ghana), Bondigui (Burkina Faso) and Finkolo (Mali)

638 sentinel sites in West Africa.

639

640

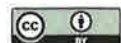

641 Figure 1

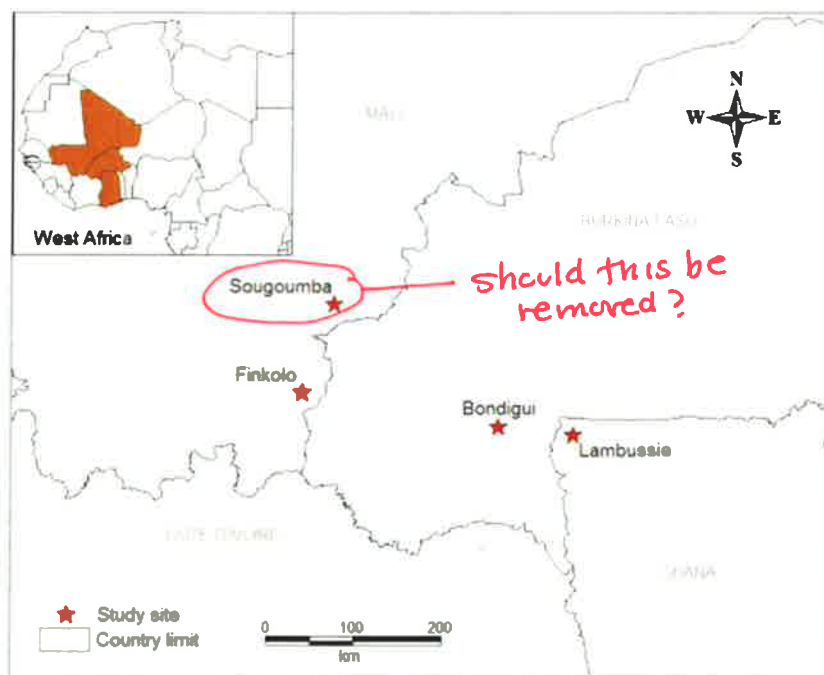

642

643



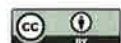

644 Figure 2

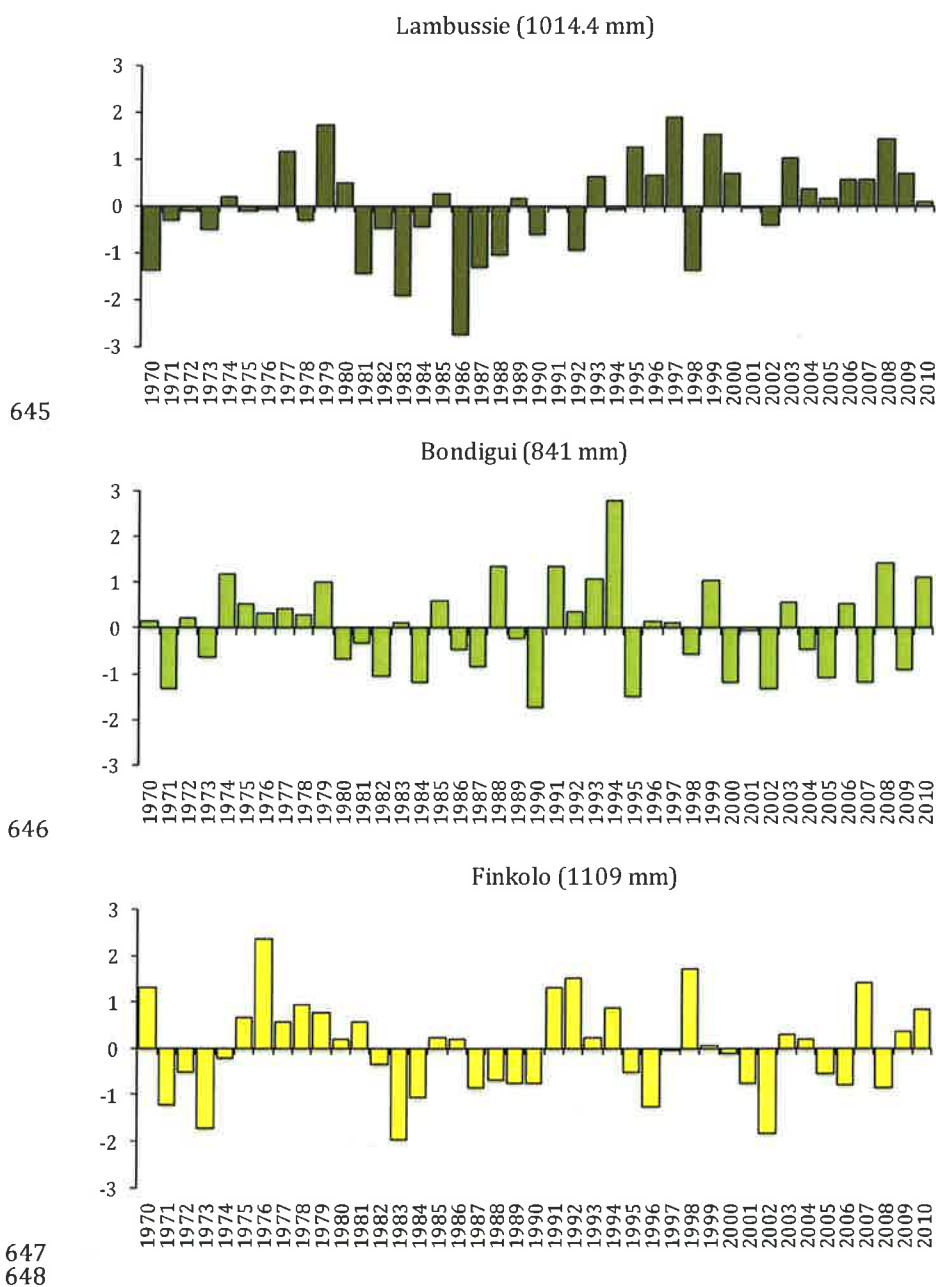

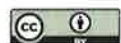

Figure 3

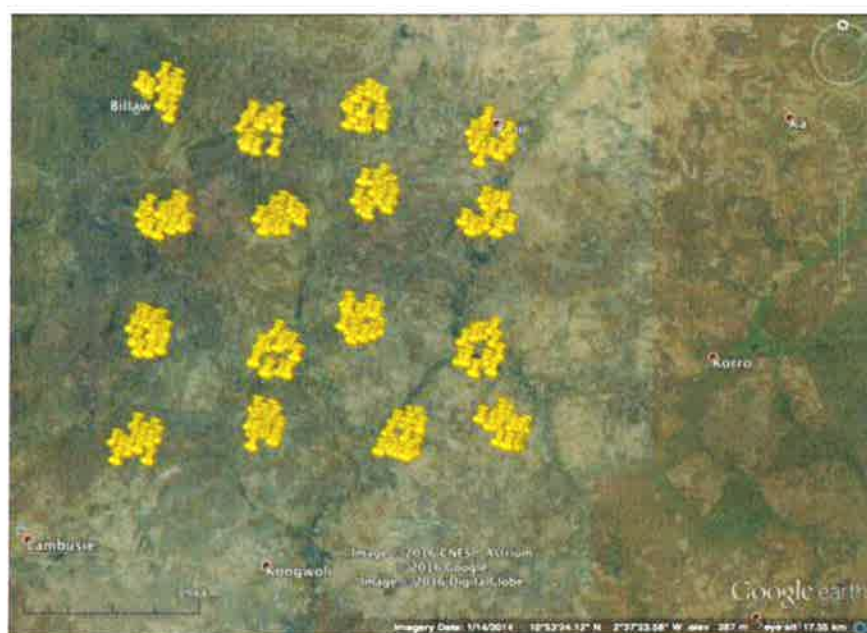

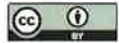

Figure 4

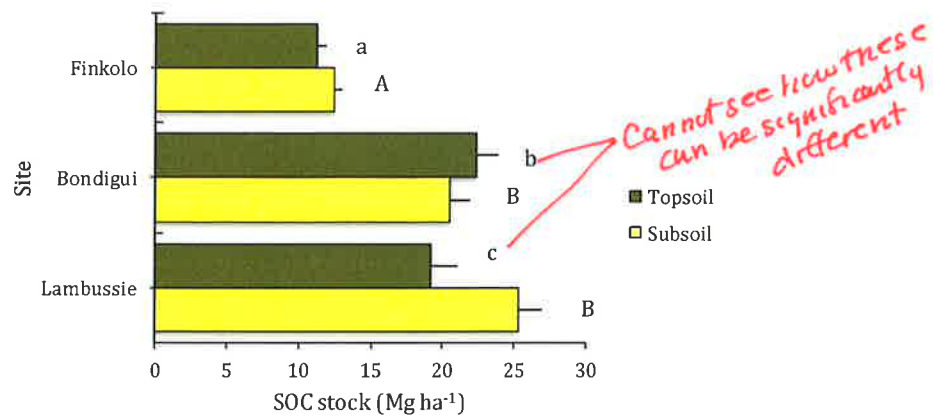

re-order: Lambussie at the top, then Bondigui, then Finkolo (like the other figures)

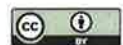

Figure 5

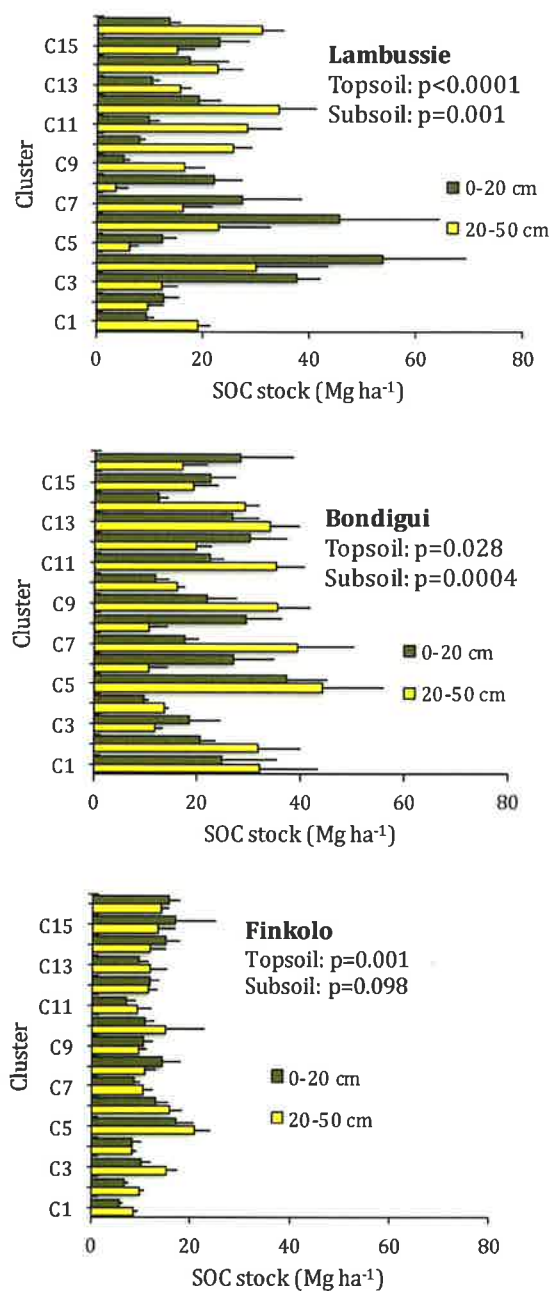

*see comments*

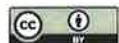

Figure 6

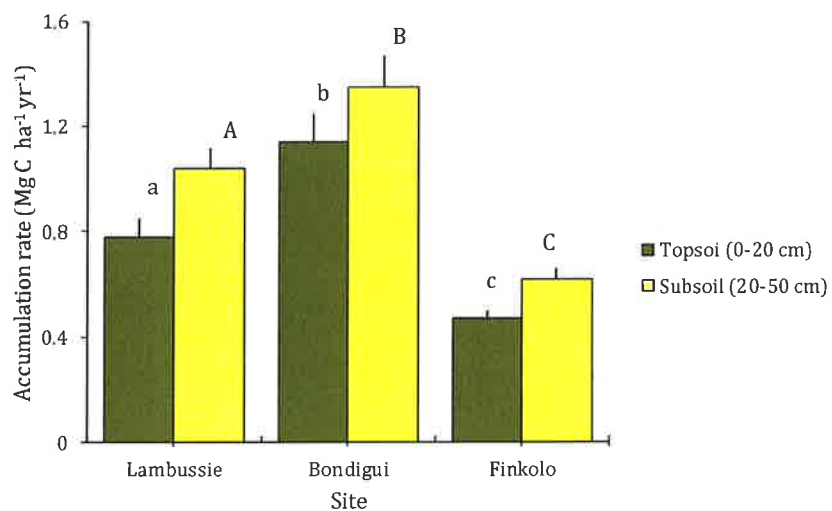

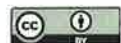

Figure 7

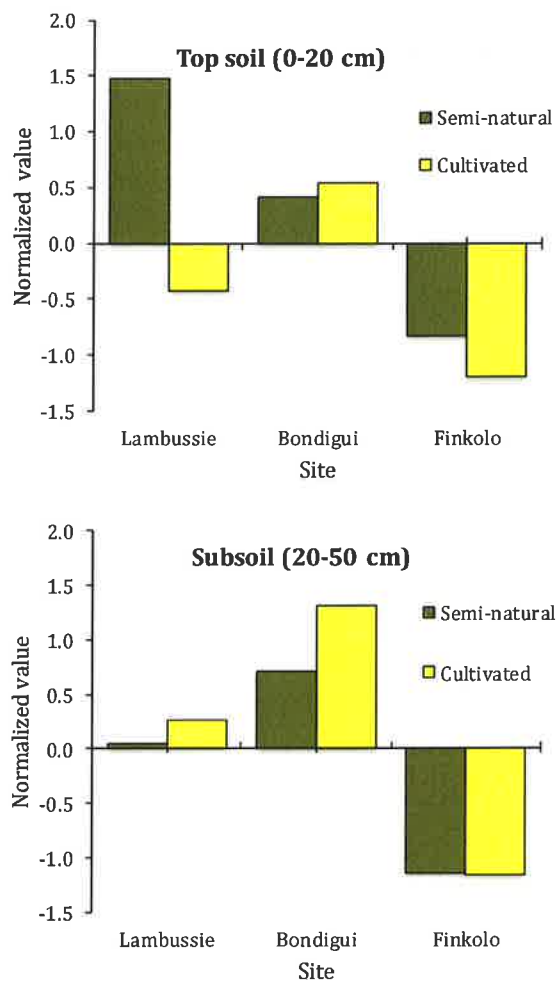

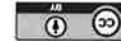

Table

Table 1. Characteristics of Lambussie (Ghana), Bondigui (Burkina Faso) and Finkolo (Mali) sentinel sites in West Africa with key land uses and tree and shrub associated.

| Sentinel site           | Latitude and longitude of 4 corner points                                                                                    | Average altitude (m) $\pm$ standard error | Main land use type                                                                                                                                   | Tree or shrub encountered in the landscapes                                                                                                                                                                                                                                                                                                                                     |
|-------------------------|------------------------------------------------------------------------------------------------------------------------------|-------------------------------------------|------------------------------------------------------------------------------------------------------------------------------------------------------|---------------------------------------------------------------------------------------------------------------------------------------------------------------------------------------------------------------------------------------------------------------------------------------------------------------------------------------------------------------------------------|
| Lambussie (Ghana)       | (10°51'42.96"N, 2°41'27.29"W;<br>10°56'7.30"N, 2°40'59.18"W;<br>10°52'3.50"N, 2°36'37.58"W;<br>10°55'30.32"N, 2°37'2.84"W)   | 301.5 $\pm$ 3.8                           | Parklands associated with maize, millet, sorghum; association maize+ rice in lowlands; rotation fallow/food crops in parklands; recurrent food crops | <i>Vitellaria paradoxa</i> , <i>Parkia biglobosa</i> , <i>Azela africana</i> , <i>Dyospiros mespiliformis</i> , <i>Detarium microcarpum</i> , <i>Gardenia erubescens</i> , <i>Vitellaria paradoxa</i> , <i>Lannea acida</i> , <i>Annona senegalensis</i> , <i>Pteleopsis ruberosa</i> , <i>Piliostigma reticulatum</i> , <i>Ficus gnaphalocarpa</i> , <i>Sterculia setigera</i> |
| Bondigui (Burkina Faso) | (10°52'41.85"N, 3°34'55.25"W;<br>10°56'26.87"N, 3°35'3.01"W;<br>10°52'35.10"N, 3°30'41.27"W;<br>10°57'16.66"N, 3°30'43.16"W) | 273.2 $\pm$ 12.6                          | Parklands in association with maize, sorghum, millet; association <i>Mangifera indica</i> /maize; rotation cotton/maize; rotation                    | <i>V. paradoxa</i> , <i>D. microcarpum</i> , <i>Bombax costatum</i> , <i>P. reticulata</i> , <i>Mitragyna inermis</i> , <i>Mangifera indica</i> , <i>Lannea velutina</i>                                                                                                                                                                                                        |



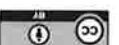

|                   |                                                                                                                                                                                                  |                                                                                                                                                                                                                         |
|-------------------|--------------------------------------------------------------------------------------------------------------------------------------------------------------------------------------------------|-------------------------------------------------------------------------------------------------------------------------------------------------------------------------------------------------------------------------|
|                   | millet/beans; recurrent food<br>crops with less fallow                                                                                                                                           |                                                                                                                                                                                                                         |
| Finkolo<br>(Mali) | (11°16'28.39"N, 5°32'2.49"W;<br>11°20'42.46"N, 5°31'50.68"W;<br>11°16'25.48"N, 5°27'58.07"W;<br>11°20'47.54"N, 5°28'18.95"W)                                                                     | 431.8 ± 12.6                                                                                                                                                                                                            |
|                   | Maize, millet, sorghum, yam,<br>sweet potato; rotation<br>cotton/maize; association<br>maize/sweet potato; rotation<br><i>M. indica</i> /food crops; rotation<br><i>Citrus lemon</i> /food crops | <i>Securidaca longepedunculata</i><br><i>V. paradoxa</i> , <i>D. microcarpum</i><br><i>Bombax costatum</i> , <i>P. reticulata</i><br><i>Mitragyna inermis</i> , <i>Mangifera</i><br><i>indica</i> , <i>Citrus lemon</i> |

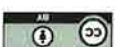

Table 2. Soil properties (average±standard error) of Lambussie (Ghana), Bondigui (Burkina Faso) and Finkolo (Mali) sentinel sites in West

Africa. Values with similar letters are not significantly different (Kruskal-Wallis test,  $p=0.05$ ).

*between sites within a soil layer*

| Soil layer |                     |                              |                                  |                                 |                                |                                 |                                 |             |             |             |           |
|------------|---------------------|------------------------------|----------------------------------|---------------------------------|--------------------------------|---------------------------------|---------------------------------|-------------|-------------|-------------|-----------|
|            | pH-H <sub>2</sub> O | SOC<br>(g kg <sup>-1</sup> ) | Total N<br>(g kg <sup>-1</sup> ) | Ca<br>(cmole kg <sup>-1</sup> ) | K<br>(cmole kg <sup>-1</sup> ) | Mg<br>(cmole kg <sup>-1</sup> ) | ExtrP<br>(mg kg <sup>-1</sup> ) | Clay<br>(%) | Silt<br>(%) | Sand<br>(%) |           |
| 0-20 cm    |                     |                              |                                  |                                 |                                |                                 |                                 |             |             |             |           |
| Topsoil    | Bondigui            | 6.7±0.1a                     | 25.4±4.2a                        | 0.97±0.2a                       | 7.8±1.5a                       | 0.22±0.02a                      | 2.4±0.5a                        | 7.0±0.3a    | 48.8±3.8a   | 24.9±1.2a   | 26.3±4.4a |
|            | Lambussie           | 6.3±0.2a                     | 17.8±3.3a                        | 0.75±0.1a                       | 6.0±2.0a                       | 0.25±0.08a                      | 1.7±0.4a                        | 7.7±2.1a    | 37.4±3.6b   | 26.1±1.6a   | 36.5±4.1b |
|            | Finkolo             | 5.5±0.1b                     | 10.7±1.7b                        | 0.40±0.1b                       | 1.5±0.2b                       | 0.15±0.02b                      | 0.9±0.08a                       | 3.5±0.4a    | 35.4±3.1b   | 20.2±2.2a   | 44.4±4.7b |
| 20-50 cm   |                     |                              |                                  |                                 |                                |                                 |                                 |             |             |             |           |
| Subsoil    | Bondigui            | 6.5±0.1a                     | 15.8±3.1a                        | 0.58±0.1a                       | 5.9±1.4a                       | 0.15±0.01a                      | 2.05±0.5a                       | 1.7±0.3a    | 53.1±4.1a   | 21.8±1.2a   | 25.1±3.9a |
|            | Lambussie           | 6.3±0.2a                     | 14.2±3.7a                        | 0.62±0.2a                       | 5.9±2.0a                       | 0.19±0.07a                      | 1.92±0.6a                       | 5.3±2.1a    | 38.7±3.8b   | 23.0±1.6a   | 38.3±4.8a |
|            | Finkolo             | 5.3±0.1b                     | 8.1±1.5b                         | 0.32±0.1b                       | 1.3±0.2b                       | 0.14±0.03a                      | 0.95±0.1a                       | 1.9±0.3a    | 44.6±3.2ab  | 23.0±2.5a   | 32.4±4.1a |

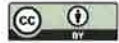

Table 3. Average estimated area under cultivation in each of cluster across Lambussie  
 (Ghana), Bondigui (Burkina Faso) and Finkolo (Mali) sentinel sites in West Africa.

| Cluster | Bondigui | Lambussie | Finkolo  |
|---------|----------|-----------|----------|
|         | % area   |           |          |
| 1       | 20       | 40        | 80       |
| 2       | 30       | 90        | 80       |
| 3       | 30       | 80        | 80       |
| 4       | 40       | 30        | 80       |
| 5       | 40       | 60        | 80       |
| 6       | 30       | 50        | 10       |
| 7       | 70       | 90        | 50       |
| 8       | 30       | 50        | 10       |
| 9       | 30       | 70        | 90       |
| 10      | 50       | 90        | 90       |
| 11      | 70       | 90        | 50       |
| 12      | 70       | 70        | 80       |
| 13      | 20       | 90        | 10       |
| 14      | 80       | 90        | 10       |
| 15      | 40       | 60        | 20       |
| 16      | 60       | 90        | 10       |
| Site    | 44±0.02a | 71±0.02b  | 52±0.03c |
| (CV %)  | (34)     | (28.1)    | (63.9)   |

← put in same order  
 as figures.  
 Lambussie, Bondigui, Finkolo

This table was not  
 asked and is  
 not necessary

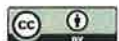

Table 4. Estimate of <sup>mean</sup> average carbon stocks <sup>density</sup> ( $\text{Mg ha}^{-1} \pm 95\%$  confidence level) ~~at plot~~  
~~level~~ and total SOC stocks ( $\text{Mg C} \pm 95\%$  confidence level) <sup>for the</sup> ~~at level~~ of Lambussie  
 (Ghana), Bondigui (Burkina Faso) and Finkolo (Mali) sentinel sites

|                |           | SOC stock $\pm 95\%$<br>confidence level<br>( $\text{Mg ha}^{-1}$ ) | Total SOC stock $\pm$<br>95% confidence level<br>( $\text{Mg C}$ ) |
|----------------|-----------|---------------------------------------------------------------------|--------------------------------------------------------------------|
|                |           |                                                                     |                                                                    |
| <i>Topsoil</i> | Lambussie | 19.2 $\pm$ 3.7                                                      | 191,500 $\pm$ 37,000                                               |
|                | Bondigui  | 22.4 $\pm$ 3                                                        | 224,000 $\pm$ 30,000                                               |
|                | Finkolo   | 11.2 $\pm$ 1.4                                                      | 112,200 $\pm$ 14,000                                               |
| <i>Subsoil</i> | Lambussie | 20.5 $\pm$ 2.8                                                      | 205,000 $\pm$ 28,000                                               |
|                | Bondigui  | 25.3 $\pm$ 3.4                                                      | 253,000 $\pm$ 34,000                                               |
|                | Finkolo   | 12.4 $\pm$ 2.8                                                      | 124,000 $\pm$ 28,000                                               |

*It appears that somehow these values are mixed up.  
 In Figure 4, the Bondigui value here looks like the  
 Lambussie value in Figure 4.*

*This Table is not necessary. All values in the first  
 column appear in Fig. 4. The second row is the first  
 column simply multiplied by a constant. The values in  
 the second column can be reported in the text.*

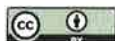

Table 5. Carbon stocks in cultivated and non-cultivated lands of Lambussie (Ghana), Bondigui (Burkina Faso) and Finkolo (Mali) sentinel sites in West Africa. For a given site, values with similar letters are not significantly different (Mann-Whitney test,  $p=0.05$ ).

Soil layer

Topsoil

| Topsoil (0-20 cm)  |              |            |        |
|--------------------|--------------|------------|--------|
|                    | Plot         | Average±SE | CV (%) |
| Lambussie          | Semi-natural | 29.7±5.9a  | 122.8  |
|                    | Cultivated   | 15.7±1.4b  | 93.7   |
| Bondigui           | Semi-natural | 21.9±2.0a  | 82.1   |
|                    | Cultivated   | 22.8±2.2a  | 80.7   |
| Finkolo            | Semi-natural | 12.7±1.2a  | 83.3   |
|                    | Cultivated   | 10.0±0.7a  | 66.1   |
| Subsoil (20-50 cm) |              |            |        |
|                    | Plot         | Average±SE | CV (%) |
| Lambussie          | Semi-natural | 19.5±3.4a  | 84.6   |
|                    | Cultivated   | 20.7±1.6a  | 75.1   |
| Bondigui           | Semi-natural | 23.4±2.1a  | 69.8   |
|                    | Cultivated   | 26.9±2.5a  | 75.1   |
| Finkolo            | Semi-natural | 12.4±1.1a  | 56.6   |
|                    | Cultivated   | 12.3±0.8a  | 56.5   |

Subsoil

Use the same format in all tables, including the ordering of sites.

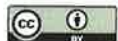

Table 6. Accumulation rate of SOC stocks in cultivated areas at plot level and total cultivated areas across Lambussie (Ghana), Bondigui (Burkina Faso) and Finkolo (Mali) sentinel sites in West Africa.

|            | Accumulation rate±95%<br>confidence level<br>(Mg C ha <sup>-1</sup> yr <sup>-1</sup> ) | Total accumulation<br>rate±95% confidence<br>level (Mg C yr <sup>-1</sup> ) |            |
|------------|----------------------------------------------------------------------------------------|-----------------------------------------------------------------------------|------------|
| Soil layer | 0-20 cm                                                                                |                                                                             |            |
|            | Lambussie                                                                              | 0.78±0.14                                                                   | 5,538±994  |
|            | Bondigui                                                                               | 1.14±0.22                                                                   | 5,016±968  |
|            | Finkolo                                                                                | 0.47±0.06                                                                   | 2,444±312  |
| Top soil   | 20-50 cm                                                                               |                                                                             |            |
|            | Lambussie                                                                              | 1.04±0.16                                                                   | 7,488±1152 |
|            | Bondigui                                                                               | 1.35±0.24                                                                   | 5,940±1056 |
|            | Finkolo                                                                                | 0.62±0.08                                                                   | 3,224±416  |
| Subsoil    |                                                                                        |                                                                             |            |

↑  
 These values already appear in Fig. 6  
 Second column could be included in text  
 and this Table removed
